# Supplementary material for: An Electrochromic Nickel Phosphate Film for Large-Area Smart Window with Ultra-Large Optical Modulation
Source: PubMed Central journal article supplement (PMC9834494; doi:10.1007/s40820-022-01002-4), 2023-01-11
Supplement: 40820_2022_1002_MOESM1_ESM.pdf [file 40820_2022_1002_MOESM1_ESM.pdf]

Supporting Information for

## An Electrochromic Nickel Phosphate Film for Large-Area Smart Window with Ultra-Large Optical Modulation

Pengyang Lei<sup>1,2,†</sup>, Jinhui Wang<sup>1,†</sup>, Yi Gao<sup>1</sup>, Chengyu Hu<sup>1</sup>, Siyu Zhang<sup>1</sup>, Xingrui Tong<sup>1</sup>, Zhuanei Wang<sup>1</sup>, Yuanhao Gao<sup>2,\*</sup>, Guofa Cai<sup>1,\*</sup>

<sup>1</sup>Key Laboratory for Special Functional Materials of Ministry of Education, National & Local Joint Engineering Research Center for High-efficiency Display and Lighting Technology, School of Materials and Engineering, and Collaborative Innovation Center of Nano Functional Materials and Applications, Henan University, Kaifeng 475004, P. R. China

<sup>2</sup>Key Laboratory of Micro-Nano Materials for Energy Storage and Conversion of Henan Province, Institute of Surface Micro and Nano Materials, College of Chemical and Materials Engineering, Xuchang University, Xuchang, Henan, 461000, P. R. China

<sup>†</sup>Pengyang Lei and Jinhui Wang contributed equally to this work.

\*Corresponding authors. E-mail: [gyh-2007@sohu.com](mailto:gyh-2007@sohu.com) (Yuanhao Gao); [caiguofa@henu.edu.cn](mailto:caiguofa@henu.edu.cn) (Guofa Cai)

### Supplementary Figures

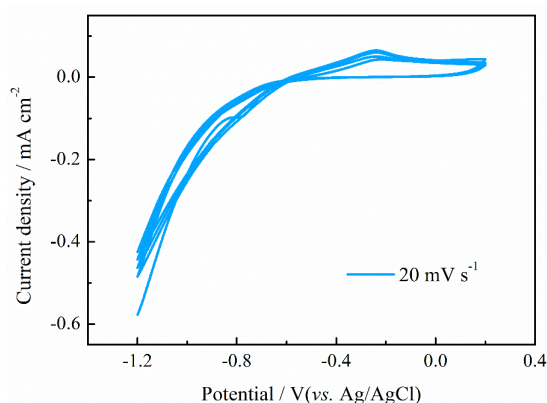

**Fig. S1** The deposition curve of NHP nanoparticles on FTO substrate by a typical electrochemical deposition method (between -1.2 and 0.2 V vs. Ag/AgCl, 20 mV s<sup>-1</sup>)

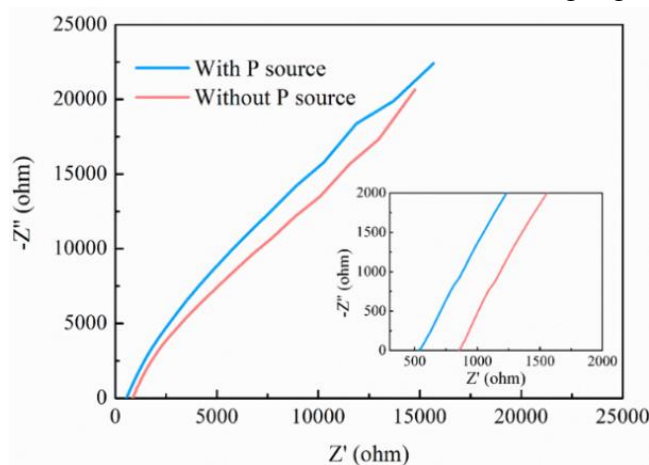

**Fig. S2** Nyquist plots of electrolytes for electrodeposition with or without phosphorus source (inset: partial enlargement). The ionic conductivity ( $\sigma$ ) was calculated from the electrolyte resistance ( $R$ ), according to Eq. [S1]:

$$\sigma = \frac{1}{R} * \frac{l}{A} \quad (S1)$$

Here,  $A$  refer to cross-sectional area of the electrolyte.

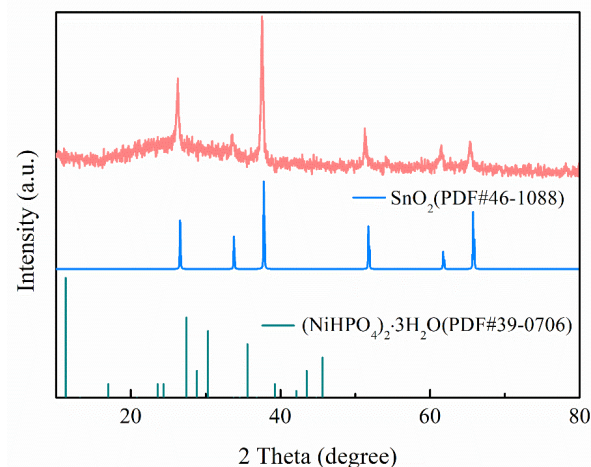

**Fig. S3** XRD pattern of NHP nanoparticles film on FTO substrate

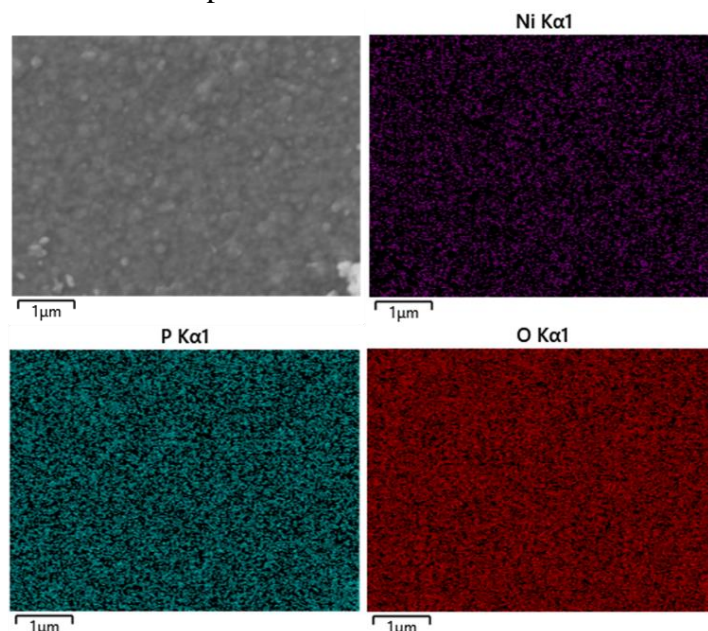

**Fig. S4** Elemental mapping of Ni, P and O was obtained by SEM for NHP nanoparticles

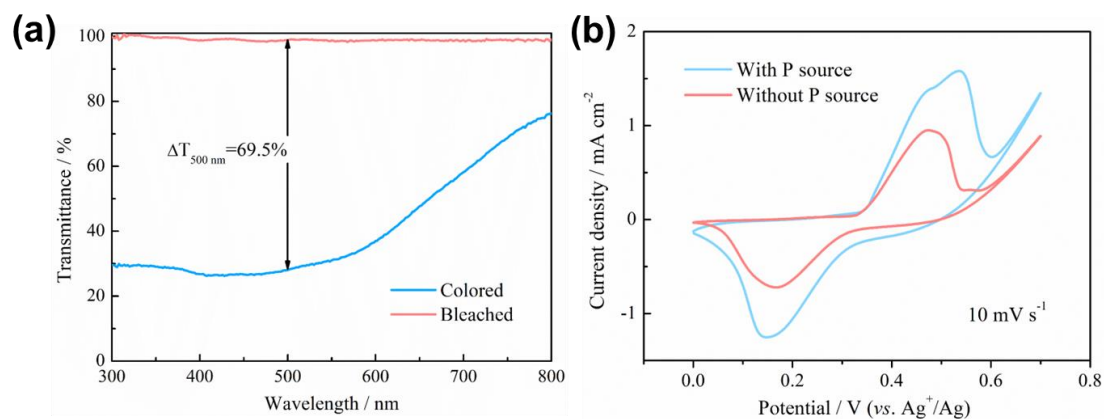

**Fig. S5 a** Optical transmittance spectra of the phosphorus-free film in 300-800 nm at colored (0.7 V vs.  $\text{Ag}^+/\text{Ag}$ ) and bleached (0 V vs.  $\text{Ag}^+/\text{Ag}$ ) states. **b** Comparison of the electrochemical activity of electrode materials deposited 4 cycles from -1.2 to 0.2 V (vs.  $\text{Ag}/\text{AgCl}$ ) at  $20 \text{ mV s}^{-1}$  in the different electrolytes (with or without phosphorus source)

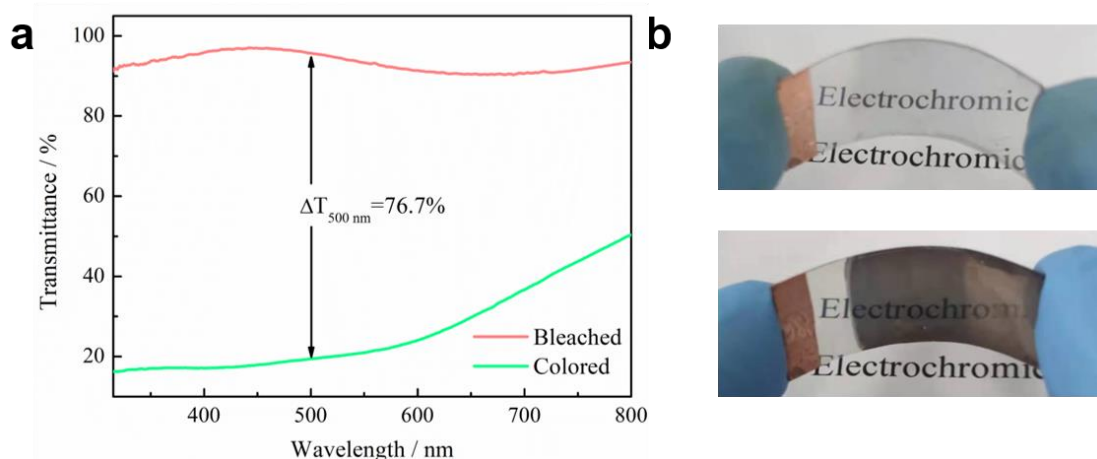

**Fig. S6 a** The optical transmittance spectra of NHP film on flexible ITO/PET substrate in 300-800 nm at colored (0.8 V vs.  $\text{Ag}^+/\text{Ag}$ ) and bleached (-0.1 V vs.  $\text{Ag}^+/\text{Ag}$ ) states. **b** Digital photographs of NHP film in the colored and bleached state under bending

**Table S1** Comparison of optical modulation at 500 nm and switching time of NHP films at different electrodeposition cycles

| Sample  | $\Delta T_{500 \text{ nm}}(\%)$ | $t_c(\text{s})$ | $t_b(\text{s})$ |
|---------|---------------------------------|-----------------|-----------------|
| 2cycles | 73.5                            | 5.4             | 7.8             |
| 4cycles | 90.8                            | 7.1             | 9.6             |
| 6cycles | 88.3                            | 8.3             | 12.9            |
| 8cycles | 86.9                            | 8.7             | 16.9            |

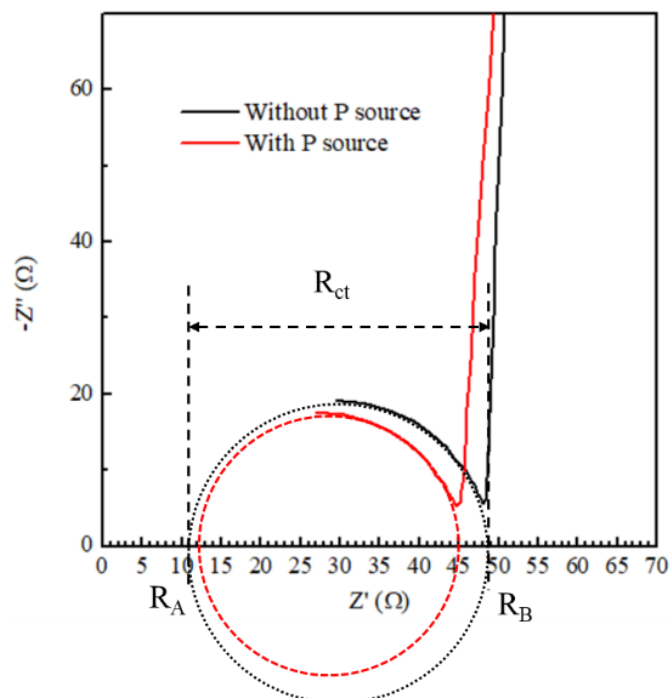

**Fig. S7** Nyquist plots of materials prepared by electrodeposition with or without phosphorus source. ( $R_{ct} = R_B - R_A$ , the  $R_A$ ,  $R_B$  and  $R_{ct}$  represent electrolyte resistance, internal resistance and charge transfer resistance, respectively)

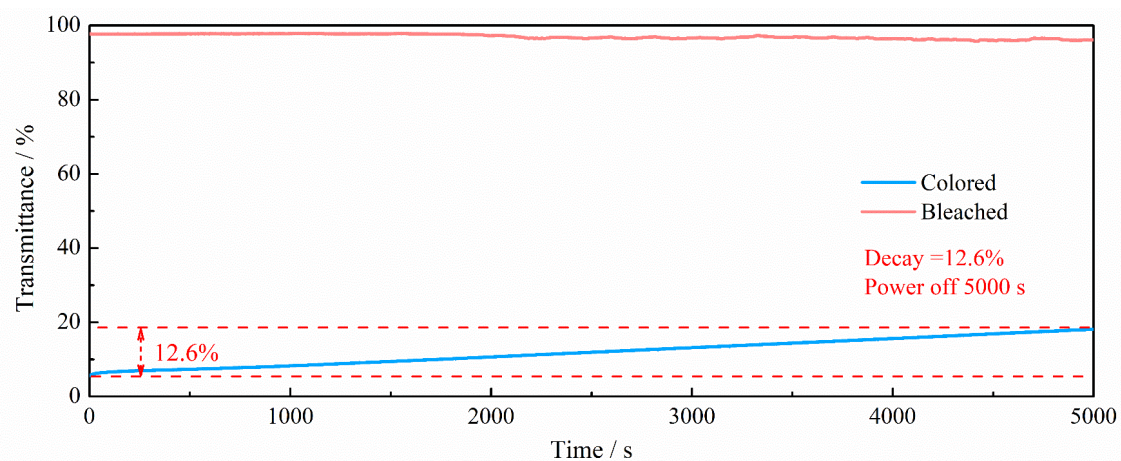

**Fig. S8** Optical memory at 500 nm of the NHP film at stimulation voltages of 0 and 0.7 V (vs.  $\text{Ag}^+/\text{Ag}$ ) for 100 s, power off for 5000 s

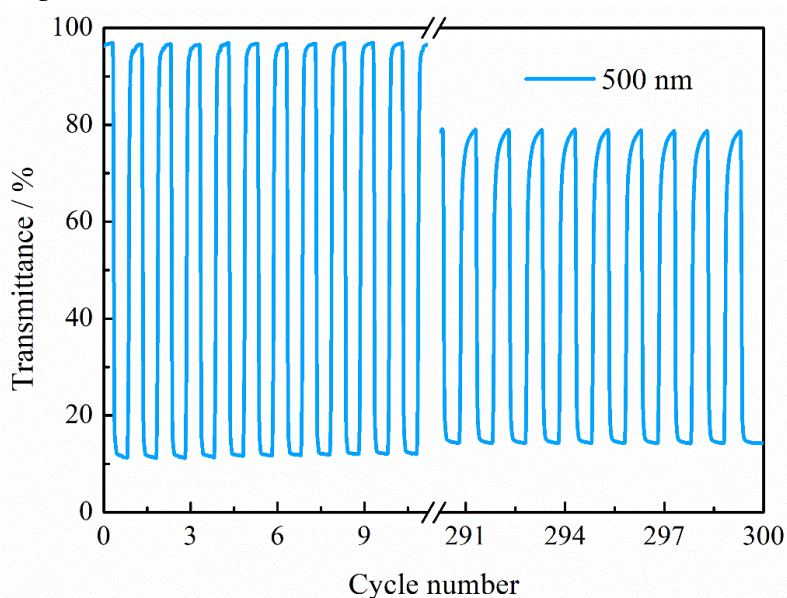

**Fig. S9** Cyclic stability measurement of NHP film at 500 nm by chronoamperometry and in-situ spectroscopic response

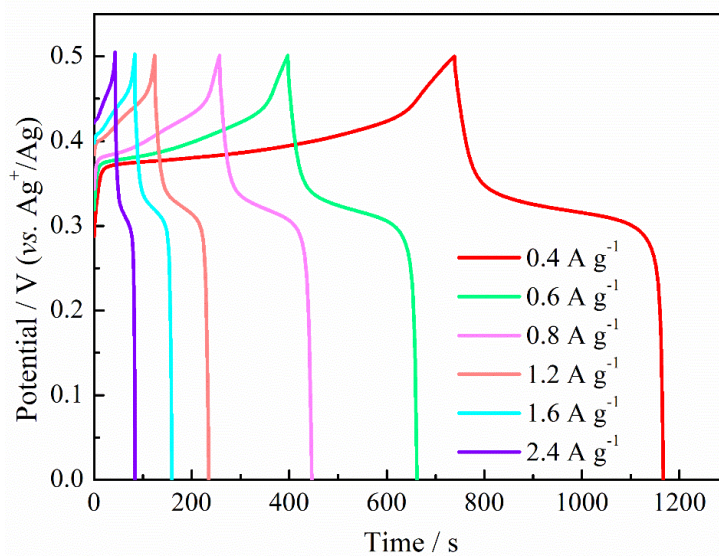

**Fig. S10** The galvanostatic charge-discharge profiles of NHP film from 0 to 0.5 V (vs.  $\text{Ag}^+/\text{Ag}$ ) under different current densities

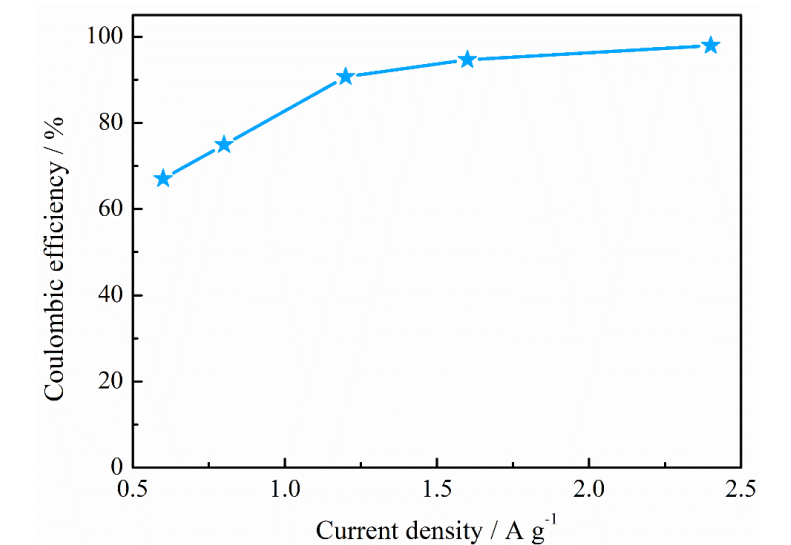

**Fig. S11** Coulombic efficiency of the NHP film corresponding to different current densities

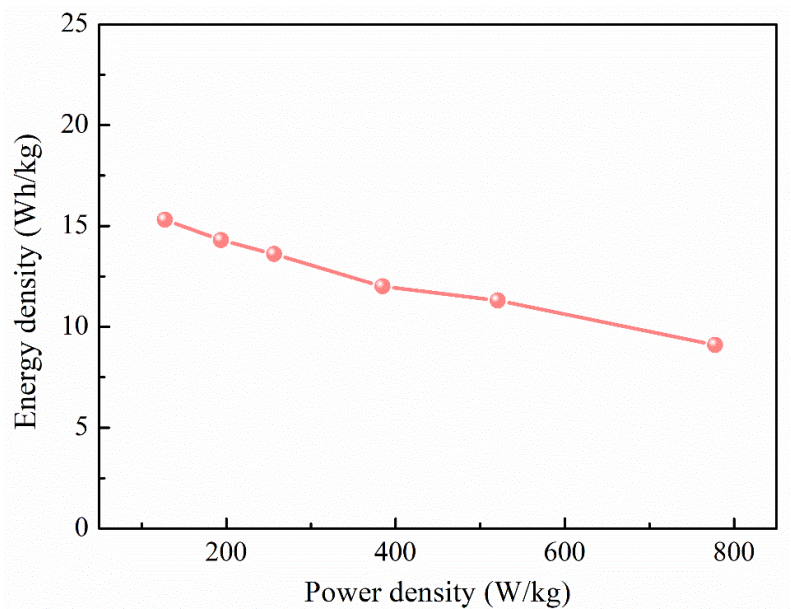

**Fig. S12** Ragone plot of the NHP film at different current densities

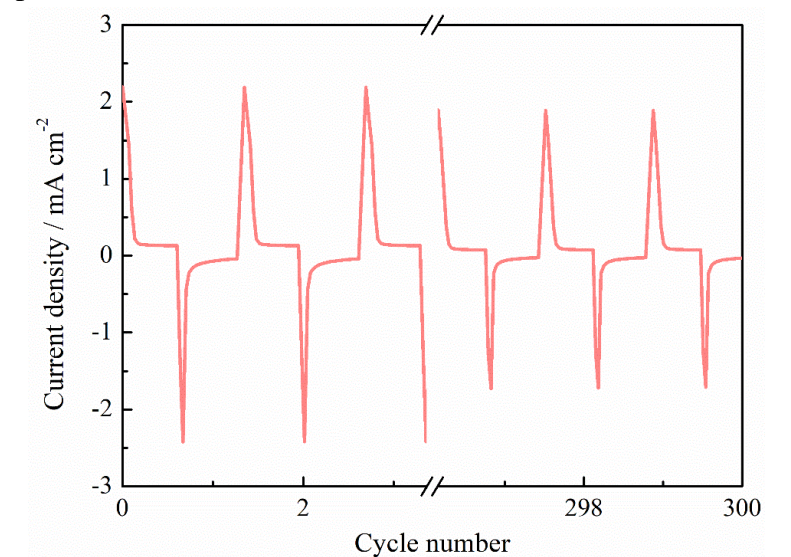

**Fig. S13** The potentiostatic charge-discharge profiles of NHP film by alternately applying 0 and 0.7 V (vs. Ag<sup>+</sup>/Ag) each for 30 s

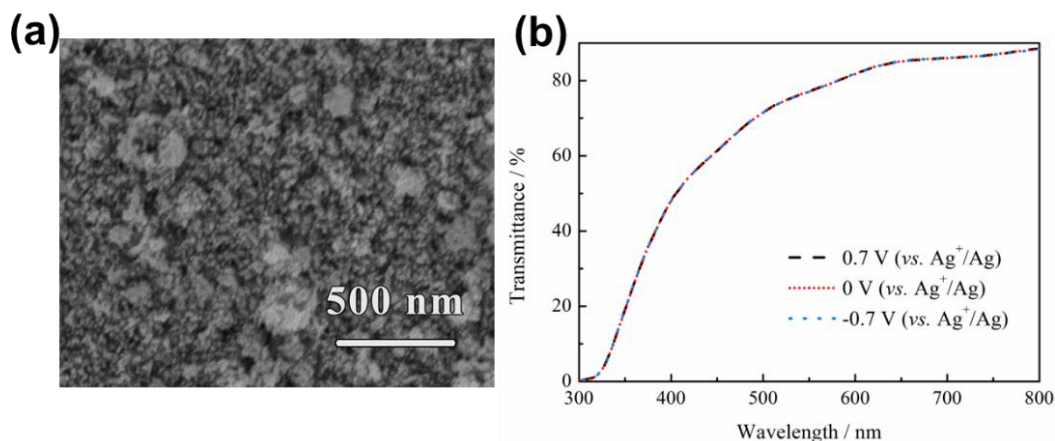

**Fig. S14** **a** SEM image of the electrostatically sprayed TiO<sub>2</sub> nanoparticles film. **b** The transmittance spectra of TiO<sub>2</sub> nanoparticles film in 1 M KOH/PVA electrolyte under different potentials

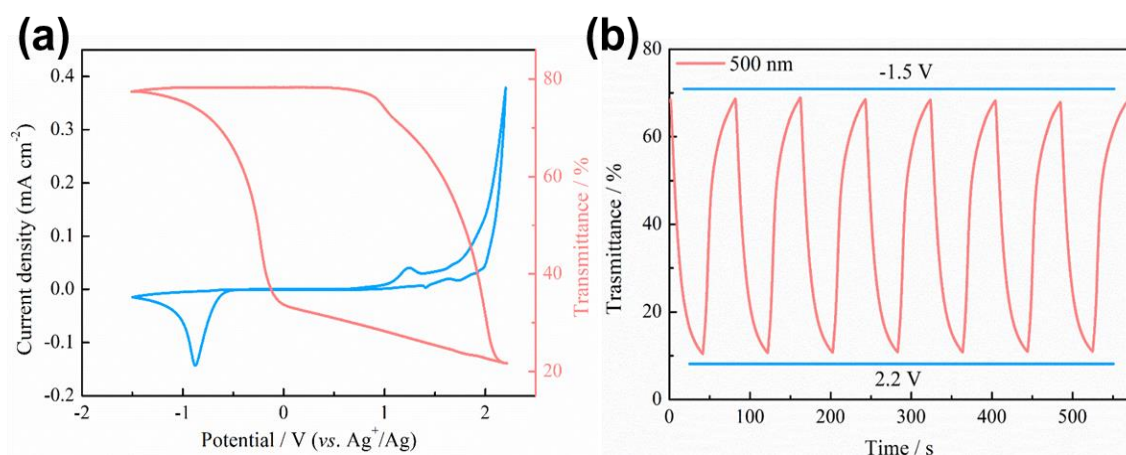

**Fig. S15** **a** CV property and in-situ optical response at 500 nm of the assembled device was tested between -1.5 and 2.2 V at 10 mV s<sup>-1</sup>. **b** The in-situ transmittance response at 500 nm was obtained by applying square wave voltages of 2.2 V and -1.5 V for 40 s

## Supplementary Reference

[S1]Z. Wang, B. François, Implementation of a choline bis(trifluoromethylsulfonyl)imide aqueous electrolyte for low temperature EDLCs enabled by a cosolvent. *J. Energy Chem.* **70**, 84-94 (2022). <https://doi.org/10.1016/j.jechem.2022.01.022>
